# Supplementary material
Source: MDPI journal article supplement (https://www.mdpi.com/1424-8247/16/8/1161)
Supplement: s1 [file s1]

# Supplementary Materials: Reports of Symptoms Associated with Supraventricular Arrhythmias as a Serious Adverse Drug Reaction in the Spanish Pharmacovigilance Database

**Table S1.** Prescribe individual drugs most often involved in case reports of symptoms associated with supraventricular as a serious arrhythmias adverse drug reactions in the Spanish Pharmacovigilance Database ( $n \geq 5$ ).

| Drug                                                                    | N | %   |
|-------------------------------------------------------------------------|---|-----|
| Amitriptilin                                                            | 5 | 0.3 |
| Carbidopa                                                               | 5 | 0.3 |
| Clavulanic acid                                                         | 5 | 0.3 |
| Lacosamide                                                              | 5 | 0.3 |
| Paclitaxel                                                              | 5 | 0.3 |
| Pregabalin                                                              | 5 | 0.3 |
| Propofol                                                                | 5 | 0.3 |
| Risperidone                                                             | 5 | 0.3 |
| Silodosin                                                               | 5 | 0.3 |
| Trastuzumab                                                             | 5 | 0.3 |
| Covid-19, viral vector, non-replicating<br>(Ad26.COVS-S [recombinante]) | 5 | 0.3 |
| Valsartan                                                               | 5 | 0.3 |
| Acetylsalicylic acid                                                    | 6 | 0.4 |
| Amlodipine                                                              | 6 | 0.4 |
| Anagrelide                                                              | 6 | 0.4 |
| Dasabuvir                                                               | 6 | 0.4 |
| Dutasteride                                                             | 6 | 0.4 |
| Infliximab                                                              | 6 | 0.4 |
| Levodopa                                                                | 6 | 0.4 |
| Lopinavir                                                               | 6 | 0.4 |
| Losartan                                                                | 6 | 0.4 |
| Metformin                                                               | 6 | 0.4 |
| Ombitasvir                                                              | 6 | 0.4 |
| Paritaprevir                                                            | 6 | 0.4 |
| Quetiapine                                                              | 6 | 0.4 |
| Ribavirin                                                               | 6 | 0.4 |
| Teriparatide                                                            | 6 | 0.4 |
| Tramadol                                                                | 6 | 0.4 |
| Ustekinumab                                                             | 6 | 0.4 |
| Influenza, inactivated, split virus or surface antigen                  | 6 | 0.4 |
| Papillomavirus (human types 16, 18)                                     | 6 | 0.4 |
| Bortezomib                                                              | 7 | 0.4 |
| Donepezil                                                               | 7 | 0.4 |
| Formoterol                                                              | 7 | 0.4 |
| Ipratropium bromide                                                     | 7 | 0.4 |
| Lenalidomide                                                            | 7 | 0.4 |
| Levofloxacin                                                            | 7 | 0.4 |
| Levothyroxine                                                           | 7 | 0.4 |
| Mirtazapine                                                             | 7 | 0.4 |
| Nebivolol                                                               | 7 | 0.4 |
| Paracetamol                                                             | 7 | 0.4 |
| Potassium                                                               | 7 | 0.4 |

---

|                                                                      |    |     |
|----------------------------------------------------------------------|----|-----|
| Rituximab                                                            | 7  | 0.4 |
| Varenicline                                                          | 7  | 0.4 |
| Adalimumab                                                           | 8  | 0.5 |
| Alendronic acid                                                      | 8  | 0.5 |
| Dexamethasone                                                        | 8  | 0.5 |
| Etoricoxib                                                           | 8  | 0.5 |
| Timolol                                                              | 8  | 0.5 |
| Venlafaxine                                                          | 8  | 0.5 |
| Abiraterone                                                          | 9  | 0.6 |
| Zoledronic acid                                                      | 9  | 0.6 |
| Azithromycin                                                         | 9  | 0.6 |
| Furosemide                                                           | 9  | 0.6 |
| Hydroxychloroquine                                                   | 9  | 0.6 |
| Rivastigmine                                                         | 9  | 0.6 |
| Metamizole                                                           | 10 | 0.7 |
| Hydrochlorothiazide                                                  | 11 | 0.7 |
| Enalapril                                                            | 12 | 0.7 |
| Mirabegron                                                           | 12 | 0.7 |
| Ritonavir                                                            | 12 | 0.7 |
| Spironolactone                                                       | 13 | 0.8 |
| Moxifloxacin                                                         | 13 | 0.8 |
| Ivabradine                                                           | 14 | 0.9 |
| Tamsulosin                                                           | 14 | 0.9 |
| Atenolol                                                             | 15 | 0.9 |
| Flecainide                                                           | 15 | 0.9 |
| Covid-19, RNA-based vaccine<br>(nucleoside modified) / Elasomeron    | 19 | 1.2 |
| Verapamil                                                            | 20 | 1.2 |
| Salbutamol                                                           | 21 | 1.3 |
| Cilostazol                                                           | 23 | 1.4 |
| Ibrutinib                                                            | 24 | 1.5 |
| Diltiazem                                                            | 26 | 1.6 |
| Covid-19, viral vector, non-replicating<br>(ChAdOx1-S [recombinant]) | 28 | 1.7 |
| Carvedilol                                                           | 29 | 1.8 |
| Amiodarone                                                           | 37 | 2.3 |
| Bisoprolol                                                           | 45 | 2.8 |
| Digoxin                                                              | 49 | 3.0 |
| Covid-19, RNA-based vaccine<br>(nucleoside modified) / Tozinameran   | 78 | 4.8 |

---

**Table S2.** Drugs mainly reported as suspected by Preferred Terms of the MedDRA classification.

| Preferred terms                  | N  | Drug                                                                                                              |
|----------------------------------|----|-------------------------------------------------------------------------------------------------------------------|
| Atrial flutter                   | 5  | Covid-19, RNA-based vaccine (nucleoside modified) / Tozinameran                                                   |
| Nodal arrhythmia                 | 5  | Verapamil                                                                                                         |
| Sinus arrhythmia                 | 1  | Atosiban<br>Bisoprolol<br>Cilostazol<br>Eslicarbazepine<br>Ibuprofen<br>Methylphenidate<br>Nebivolol<br>Trazodone |
| Supraventricular arrhythmia      | 4  | Papillomavirus (human types 16, 18)                                                                               |
| Atrio-ventricular (AV) block     | 41 | Clavulanic acid                                                                                                   |
| First degree AV block            | 1  | Carvedilol<br>Cilostazol<br>Desloratadine<br>Mepiramine<br>Pantoprazole                                           |
| Second degree AV block           | 1  | Moxifloxacin                                                                                                      |
| Complete AV block                | 4  | Diltiazem                                                                                                         |
| Sinus bradycardia                | 19 | Bisoprolol                                                                                                        |
| Nodal dysfunction                | 0  | 0                                                                                                                 |
| Supraventricular extrasystole    | 6  | Covid-19, RNA-based vaccine (nucleoside modified) / Tozinameran                                                   |
| Atrial fibrillation              | 68 | Covid-19, RNA-based vaccine (nucleoside modified) / Tozinameran                                                   |
| Sinus arrest                     | 3  | Diltiazem                                                                                                         |
| Nodal rhythm                     | 5  | Amiodarone<br>Bisoprolol<br>Digoxin                                                                               |
| Atrial tachycardia               | 3  | Covid-19, RNA-based vaccine (nucleoside modified) / Tozinameran                                                   |
| Supraventricular tachyarrhythmia | 1  | Covid-19, viral vector, non-replicating (Ad26.COV2-S [recombinante])                                              |
| Sinus tachycardia                | 27 | Covid-19, RNA-based vaccine (nucleoside modified) / Tozinameran                                                   |
| Supraventricular tachycardia     | 12 | Covid-19, RNA-based vaccine (nucleoside modified) / Tozinameran                                                   |

**Table S3.** Distribution of reports in FEDRA® according to Preferred Term of the MedDRA classification with a fatal outcome.

| Report | Group AGE          | SeX     | Drug                                                           | Preferred term               |
|--------|--------------------|---------|----------------------------------------------------------------|------------------------------|
| 1      | 65 years and older | Male    | Azithromycin                                                   | Atrial flutter               |
|        |                    |         | Hydroxychloroquine                                             |                              |
|        |                    |         | Lopinavir                                                      |                              |
|        |                    |         | Ritonavir                                                      |                              |
|        |                    |         | Tocilizumab                                                    |                              |
| 2      | 65 years and older | Female  | Digoxin                                                        | Sinus bradycardia            |
| 3      | 65 years and older | Female  | Iomeprol                                                       | Sinus bradycardia            |
| 4      | 65 years and older | Female  | Bisoprolol                                                     | Sinus bradycardia            |
| 5      | 65 years and older | Male    | Cisplatin                                                      | Atrial fibrillation          |
|        |                    |         | Gemcitabine                                                    |                              |
|        |                    |         | Paclitaxel                                                     |                              |
| 6      | Unknown            | Unknown | Amiodarone                                                     | Atrial fibrillation          |
| 7      | 65 years and older | Male    | Pregabalin                                                     | Atrial fibrillation          |
| 8      | 65 years and older | Female  | Levosimendan                                                   | Atrial fibrillation          |
| 9      | 65 years and older | Female  | Adalimumab                                                     | Atrial fibrillation          |
|        |                    |         | Metrotexate                                                    |                              |
| 10     | 65 years and older | Female  | Ertapenem                                                      | Atrial fibrillation          |
| 11     | 65 years and older | Male    | Fibrinogen, human                                              | Atrial fibrillation          |
|        |                    |         | Thrombin                                                       |                              |
| 12     | 65 years and older | Female  | Enoxaparin                                                     | Atrial fibrillation          |
| 13     | 65 years and older | Female  | Irinotecan                                                     | Atrial fibrillation          |
|        |                    |         | Panitumumab                                                    |                              |
| 14     | 65 years and older | Male    | Adalimumab                                                     | Atrial fibrillation          |
|        |                    |         | Azathioprine                                                   |                              |
| 15     | 65 years and older | Female  | Amiodarone                                                     | Atrial fibrillation          |
|        |                    |         | Digoxin                                                        |                              |
| 16     | Adult              | Female  | Cytarabine                                                     | Atrial fibrillation          |
|        |                    |         | Fludarabine                                                    |                              |
|        |                    |         | Idarubicin                                                     |                              |
| 17     | 65 years and older | Male    | Acetylsalicylic acid                                           | Atrial fibrillation          |
|        |                    |         | Warfarin                                                       |                              |
| 18     | Adult              | Male    | Covid-19, RNA-based vaccine (nucleoside modified) / Elasomeran | Atrial fibrillation          |
| 19     | 65 years and older | Male    | Amphotericin B                                                 | Supraventricular tachycardia |
| 20     | 65 years and older | Female  | Tolterodine                                                    | Supraventricular tachycardia |
| 21     | 65 years and older | Female  | Influenza, inactivated, split virus or surface antigen         | Supraventricular tachycardia |
| 22     | 65 years and older | Male    | Ipratropium bromide                                            | Supraventricular tachycardia |
|        |                    |         | Mesna                                                          |                              |
| 23     | 65 years and older | Female  | Iopromide                                                      | Supraventricular tachycardia |
